# Supplementary figures and images for: Differences between Obese and Non-Obese Children and Adolescents Regarding Their Oral Status and Blood Markers of Kidney Diseases
Source: MDPI journal article supplement (doi:10.3390/jcm10163723), 2021-08-21

Figure 1. Flow chart of the study.

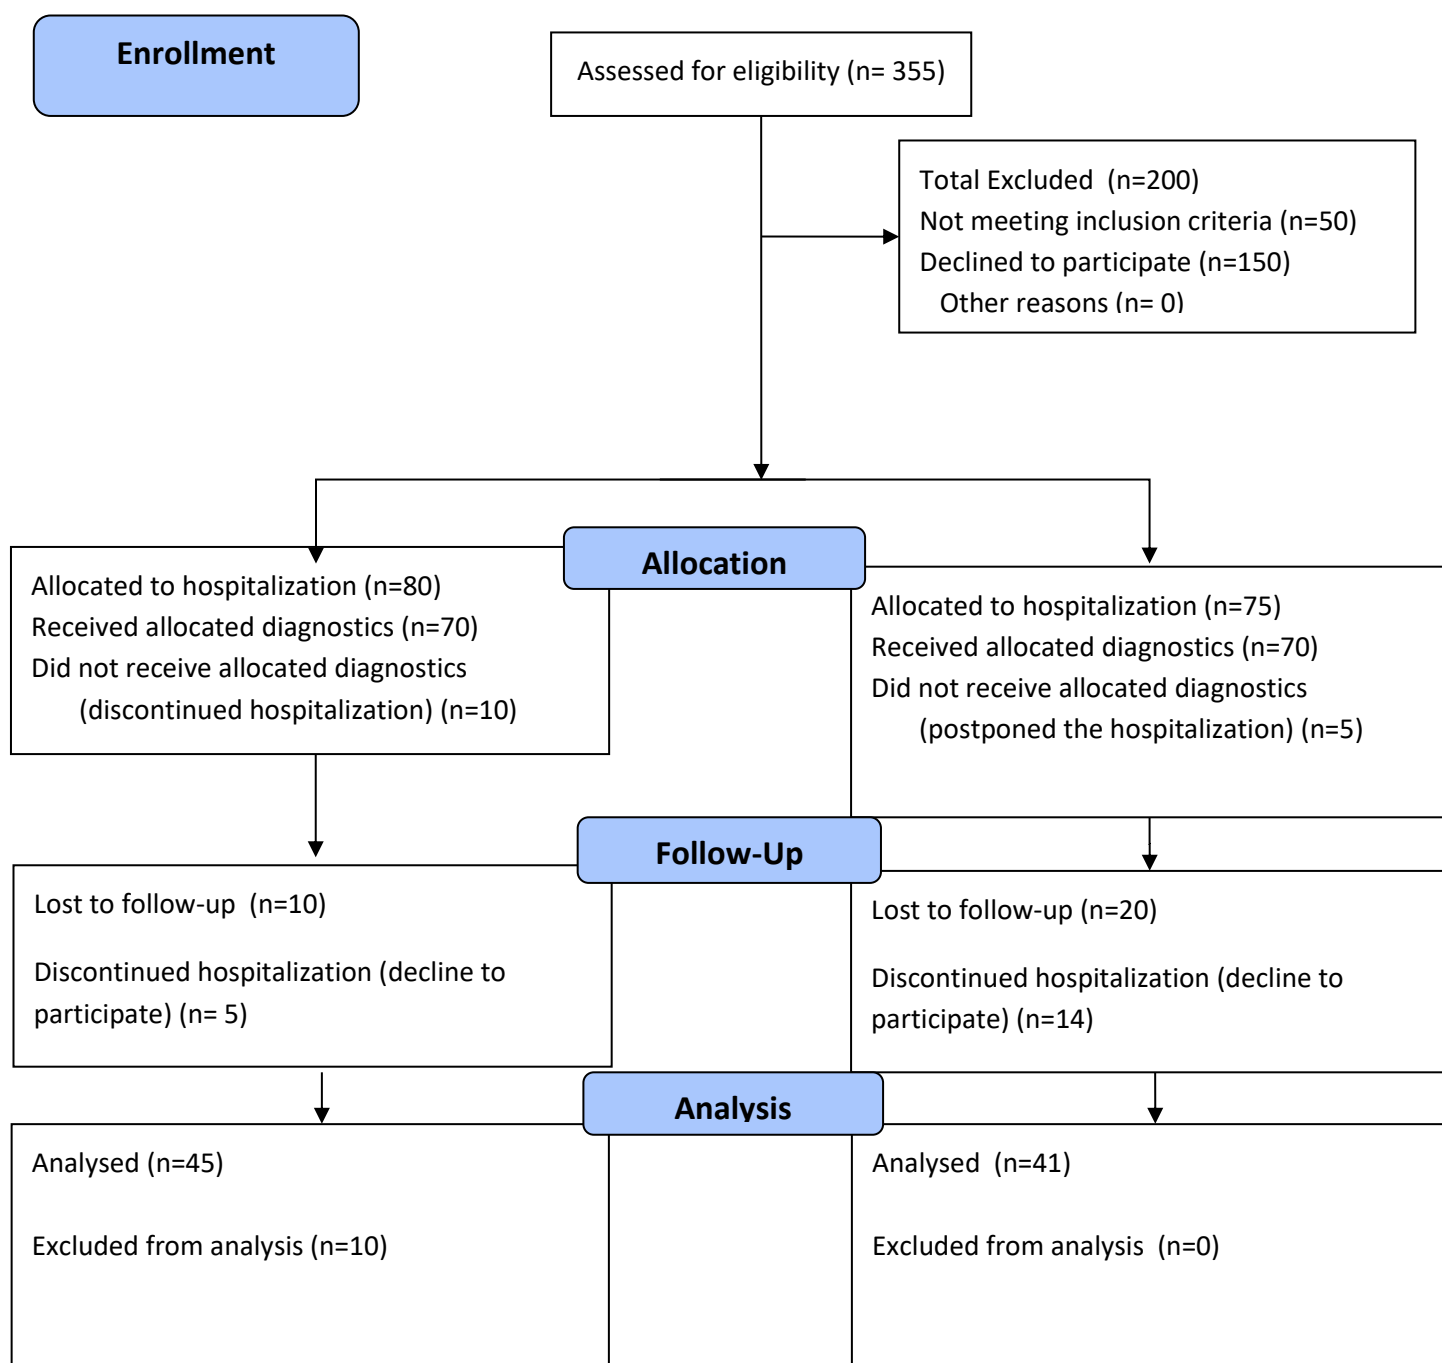

Supplement: s1 [file s1]
